# Supplementary material for: Intrinsic and extrinsic risk factors in tumor-related epilepsy
Source: Research Square preprint supplement (doi:10.21203/rs.3.rs-6403995/v1), 2025-05-26
Supplement: Supplementary file 1 [file c904d09b7843628a3f74ab2c.docx]

| 10. Supplements **Supplemental methods**  MRI images generally fulfilled the following minimal requirements: 3 Tesla Skyra VD13 (Siemens, Erlangen, Germany) using a 32-channel head coil with the following parameters: a high-resolution 3D T1-weighted anatomical sequence planned on the ACPC line plus 20° on a sagittal image with voxel size: 0.8 × 0.8 ×1.0 mm3 with a Field of View 230×230 mm2 and resolution of 288 × 288. 176 slices per slab with a thickness of 1 mm, TR/TE 2200/5.14 ms, TI 900 ms, flip angle 8°. FLAIR images acquired with the same orientation as the T1-weighted images. The acquisition parameters were as followed 0.9 × 0.9 × 1.0 mm3 with a Field of View 230 × 230 mm2 and resolution of 256 × 256, 176 slices per slab with a thickness of 1 mm, TR/TE 4000/387 ms, TI 1800 ms.  **Supplemental results**  **Supplemental Table 1.** TEFs and TIFs of patients containing primary or secondary brain tumor.  Total patients (TP) = 373. Total subgroup quantity (TS).  *Categorial variables:* Subgroup prevalence, affected individuals (N) and seizure incidence (%) including confidence interval (CI).  *Continuous variables*: Means of non-affected (above) vs. affected (below) individuals including standard deviation (SD).  *Both*: Odds ratios (OR) including CI and p value from univariable binary logistic regression. | | | | | |
| --- | --- | --- | --- | --- | --- |
| Risk factor | Subgroup  prevalence % (= TS/TP) | Cat.: N/TS  Cont.: Mean (SD) | Seizure incidence  (CI 95%) | Odds ratio (CI 95%) | P value |
| *Tumor-extrinsic* |  |  |  |  |  |
| Sex  Female (ref.)  Male | 52 %  48 % | 46/194  64/179 | 23.7 % (23.1 - 24.3)  35.8 % (35.1 - 36.5) | 1 (ref.)  1.79 (1.14 - 2.82) | **0.0113** |
| Age (cont.) |  | 55.7 (15.7)  55.3 (15.3) |  | 0.998 (0.984 - 1.012) | 0.8189 |
| BMI groups  ≥ 30: Obese (ref.)  25 - 29.9: Overweight  18.5 - 24.9: Normal  < 18.5: Underweight | 13.4 %  33.8 %  47.2 %  5.6 % | 7/50  32/126  62/176  9/21 | 14 % (13 - 15)  25.4 % (24.6 - 26.2)  35.2 % (34.5 - 35.9)  42.9 % (40.7 - 45) | 1 (ref.)  2.09 (0.9 - 5.5)  3.34 (1.5 - 8.52)  4.61 (1.44 - 15.54) | 0.1058  **0.0058**  **0.011** |
| Alcohol abuse  No (ref.)  Yes | 94.3 %  5.6 % | 101/352  9/21 | 28.7 % (28.2 - 29.2)  42.9 % (40.7 - 45) | 1 (ref.)  1.86 (0.74 - 4.54) | 0.1725 |
| Smoking pack-years (cont.) |  | 9.4 (18.5)  16.7 (25) |  | 1.015 (1.005 - 1.026) | **0.003** |
| Pathological Na+/K+ blood value  No (ref.)  Yes | 80.1 %  19.9 % | 81/299  29/74 | 27.1 % (26.6 - 27.6)  39.2 % (38.1 - 40.3) | 1 (ref.)  1.73 (1.01 - 2.94) | **0.0424** |
|  |  |  |  |  |  |
| *Tumor-intrinsic* |  |  |  |  |  |
| Pathology  WHO grade 3/4 glioma (ref.)  WHO grade 1/2 neuroepith. tumor  Pit. adenoma/craniopharyngioma  Primary CNS Lymphoma  Meningioma  Metastasis  Schwannoma  Tumor otherwise | 26.3 %  4.3 %  8.6 %  3.5 %  21.7 %  21.5 %  3.6 %  10.5 % | 32/98  7/16  2/32  5/13  19/81  32/80  1/14  12/39 | 32.7 % (31.7 - 33.6)  43.6 % (41.3 - 46.2)  6.3 % (5.4 - 7.1)  38.5 % (35.8 - 41.1)  23.5 % (22.5 - 24.4)  40.0 % (38.9 - 41.1)  7.1 % (5.8 - 8.5)  30.8 % (29.3 - 32.2) | 1 (ref.)  1.61 (0.53 - 4.70)  0.14 (0.02 - 0.50)  1.29 (0.36 - 4.18)  0.63 (0.32 - 1.22)  1.38 (0.74 - 2.55)  0.16 (0.01 - 0.85)  0.92 (0.40 - 2.01) | 0.3885  **0.0092**  0.6769  0.1764  0.3102  0.0824  0.8313 |
| Diameter mm (cont.) |  | 36.2 (17.3)  36.3 (16.9) |  | 1.00 (0.987 - 1.014) | 0.9425 |
| Location  Other (ref.)  Frontal lobe  Parietal lobe  Temporal lobe  Occipital lobe  Central lobe  Cerebellum  Multifocal (intraparenchymal)  Convexity (osseus/meningeal)  Intracranial dural folds  Anterior cranial fossa  Middle cranial fossa  Posterior cranial fossa | 13.4 %  9.7 %  6.4 %  12.9 %  3.8 %  6.1 %  4.8 %  11 %  10.5 %  4.3 %  4 %  5.6 %  7.5 % | 7/50  13/36  9/24  17/48  4/14  21/23  1/18  17/41  12/39  5/16  1/15  2/21  1/28 | 14 % (4.4 - 23.6)  36.1 % (20.4 - 51.8)  37.5 % (18.1 - 56.9)  35.4 % (21.9 - 48.9)  28.6 % (4.9 - 52.2)  91.3 % (79.8 - 100)  5.6 % (0.0 - 16.1)  41.5 % (26.4 - 56.5)  30.8 % (16.3 - 45.3)  31.3 % (8.5 - 54)  6.7 % (0.0 - 19.3)  9.5 % (0.0 - 22.1)  3.6 % (0.0 - 10.4) | 1 (ref.)  3.47 (1.25 - 10.40)  3.69 (1.18 - 12.06)  3.37 (1.29 - 9.63)  2.46 (0.56 - 9.92)  64.5 (14.88 - 466.3)  0.36 (0.02 - 2.25)  4.35 (1.64 - 12.66)  2.73 (0.98 - 8.16)  2.79 (0.71 - 10.56)  0.44 (0.02 - 2.78)  0.65 (0.09 - 2.98)  0.23 (0.01 - 1.38) | **0.02**  **0.0261**  **0.0166**  0.2108  **< 0.0001**  0.3577  **0.0044**  0.0606  0.1288  0.4590  0.6071  0.1769 |
| **Supplemental Table 2.** Odds ratios from multivariable analysis. Tested tumor-extrinsic and -intrinsic risk factors containing factors with mainly significant subcategories (p value < 0.05) in univariable analysis. | | | | | |
| Risk factor |  |  |  | Odds ratio (CI 95%) | P value |
| *Tumor-extrinsic* |  |  |  |  |  |
| Sex  Female (ref.)  Male |  |  |  | 1 (ref.)  1.77 (1.03 - 3.08) | **0.0411** |
| BMI groups  ≥ 30: Obese (ref.)  25 - 29.9: Overweight  18.5 - 24.9: Normal  < 18.5: Underweight |  |  |  | 1 (ref.)  1.6 (0.61 - 4.64)  2.34 (0.93 - 6.65)  4.23 (1.12 - 16.91) | 0.3586  0.0851  **0.0353** |
| Smoking pack-years (cont.) |  |  |  | 1.013 (1 - 1.026) | **0.0435** |
| Pathological Na+/K+ blood value  No (ref.)  Yes |  |  |  | 1 (ref.)  1.04 (0.54 - 2.07) | 0.9098 |
| *Tumor-intrinsic* |  |  |  |  |  |
| Location  Other (ref.)  Frontal lobe  Parietal lobe  Temporal lobe  Occipital lobe  Central lobe  Cerebellum  Multifocal (intraparenchymal)  Convexity (osseus/meningeal)  Intracranial dural folds  Anterior cranial fossa  Middle cranial fossa  Posterior cranial fossa |  |  |  | 1 (ref.)  3.76 (1.31 - 11.62)  3.47 (1.05 - 11.97)  3.7 (1.37 - 10.92)  2.19 (0.46 - 9.58)  58.15 (12.54 - 439.43)  0.29 (0.01 - 1.9)  3.45 (1.21 - 10.59)  3.69 (1.25 - 11.64)  3.73 (0.9 - 15.02)  0.57 (0.03 - 3.72)  0.72 (0.1 - 3.45)  0.32 (0.02 - 1.99) | **0.0163**  **0.0429**  **0.0124**  0.3019  **< 0.0001**  0.2711  **0.0236**  **0.0204**  0.0626  0.6132  0.7041  0.2997 |
